# Supplementary material
Source: PubMed Central journal article supplement (PMC4081558)
Supplement: NIHMS591239-supplement-01.pdf [file NIHMS591239-supplement-01.pdf]

Rosa et al., 2013

Supplementary figures and tables

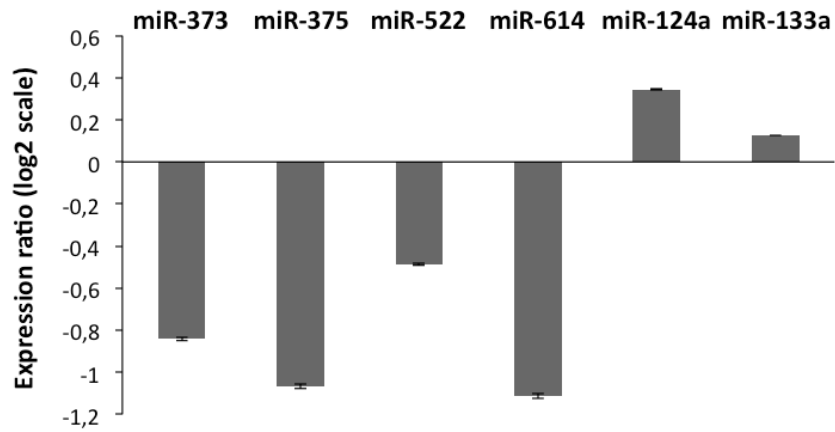

**Supplementary Figure 1.** Real-time qPCR confirms the Illumina microarray results. qPCR was performed on SB- or DMSO-treated RUES2 cells for 24 hours in order to validate the results obtained through Illumina analysis. Data are presented as a fold-change of expression compared to DMSO-treated cells, on a log2 scale.

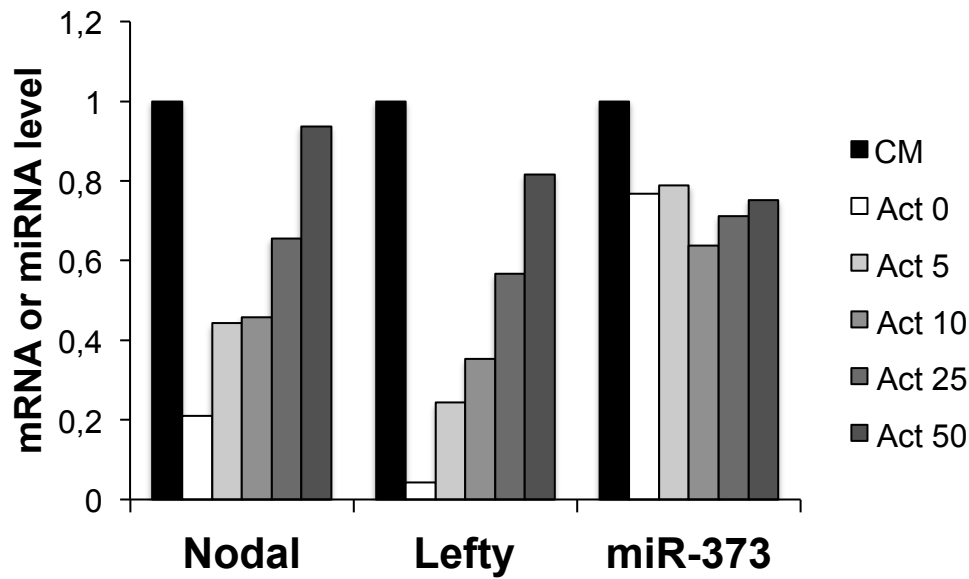

**Supplementary Figure 2.** Real-time qPCR analysis of the levels of Nodal and Lefty mRNAs and miR-373 upon induction with recombinant ActivinA in non MEF-Conditioned hESC Medium (nCM). RUES2 cells were maintained in MEF-Conditioned Medium (CM, black bars) or switched to nCM for 24 hours in the absence (white bars) or presence (grey bars) of increasing amounts of ActivinA (5-10-25-50 ng/ml). While Nodal/Activin signaling is necessary and sufficient for proper Nodal and Lefty expression, it is necessary (see Figure 1) but not sufficient for miR-373 expression, as other components of the CM may be required for miR-373 activation.

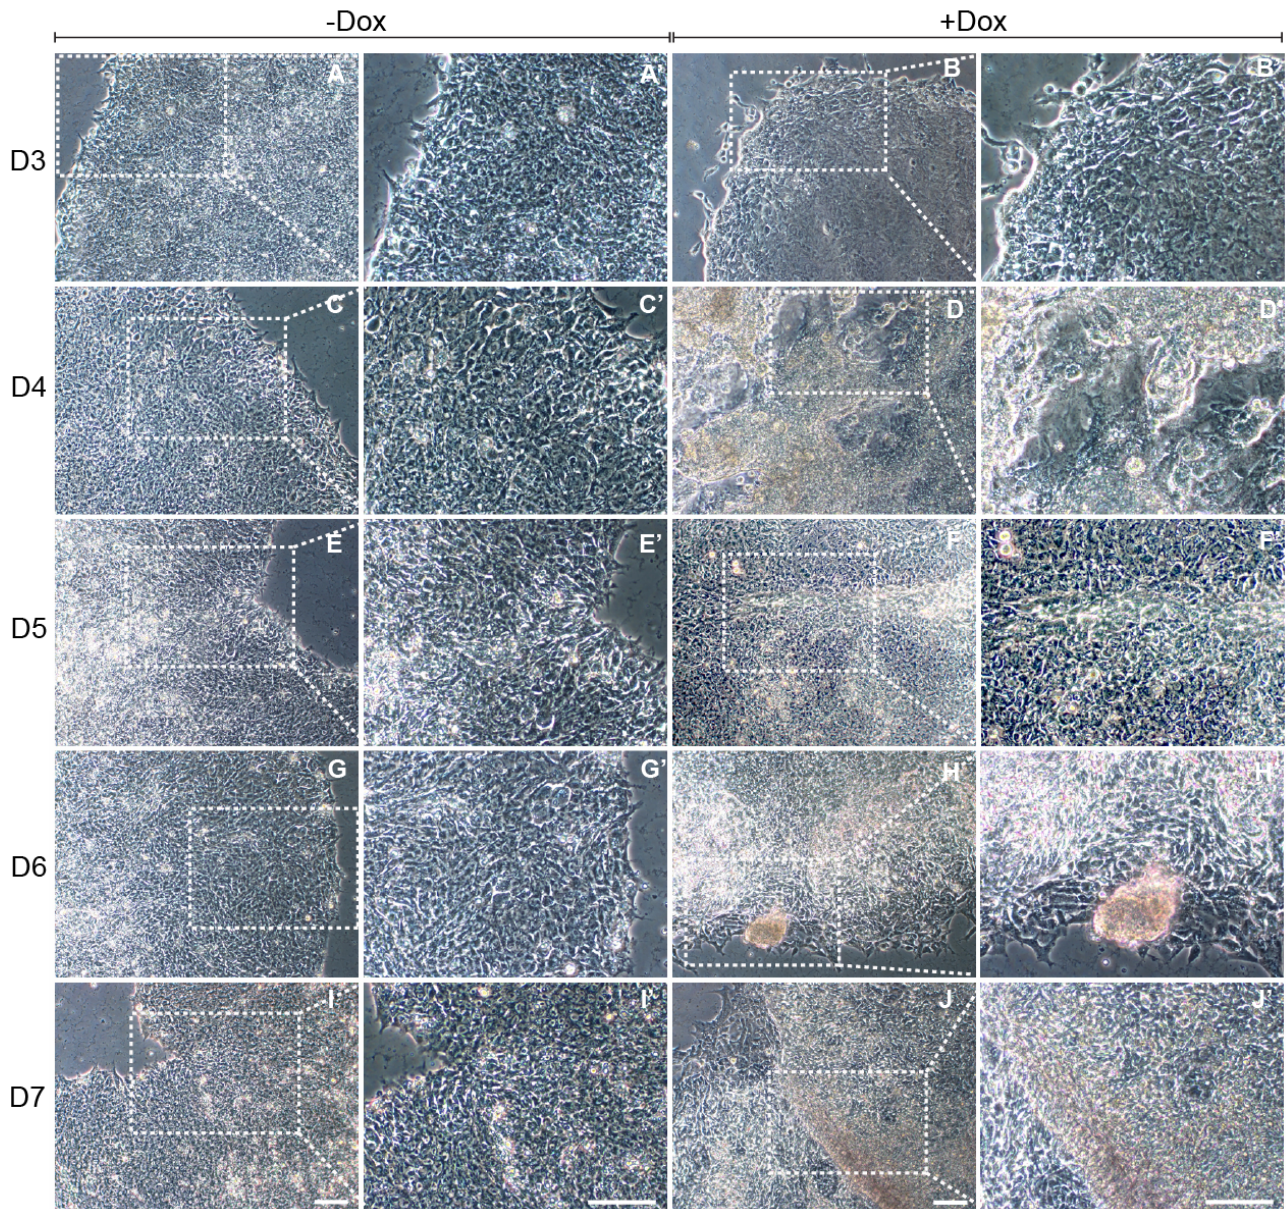

**Supplementary Figure 3.** Upon miR-373 overexpression, hESCs differentiate morphologically as early as day 3. Shown here are representative images of TT-miR-373 cells that were induced (+Dox) or not (-Dox) over a period of seven days. Areas highlighted with white dashed boxes in the first and third columns are shown in higher magnification in their adjacent images. Scale bars: 100 $\mu$ m.

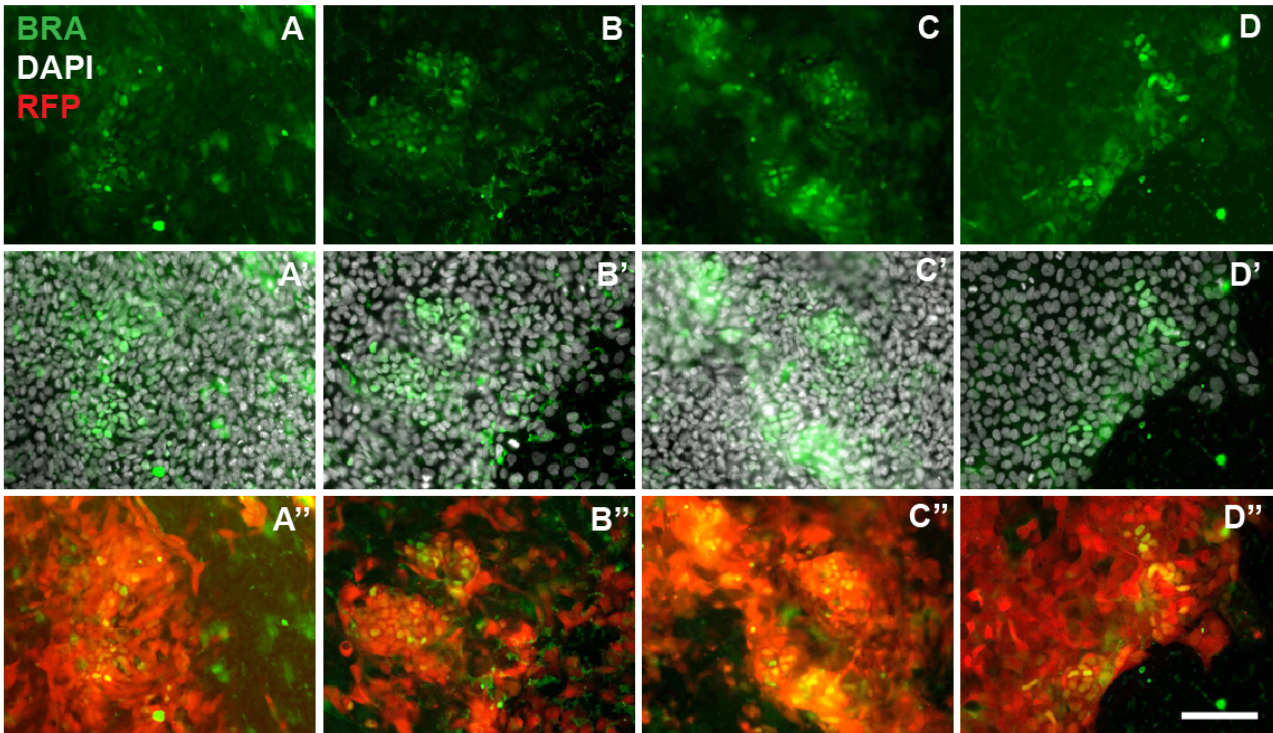

**Supplementary Figure 4.** Numerous BRA-positive cells appeared dispersed within miR-373-overexpressing colonies. Shown here are representative images of areas harboring BRA+ cells in TT-miR-373 induced colonies. BRA+ cells were mostly found dispersed within a colony, either in (A, C) or close to the borders (B, D) of a colony. DAPI was used for nuclear staining; reporter RFP expression was also visualized. Scale bars: 100 $\mu$ m.

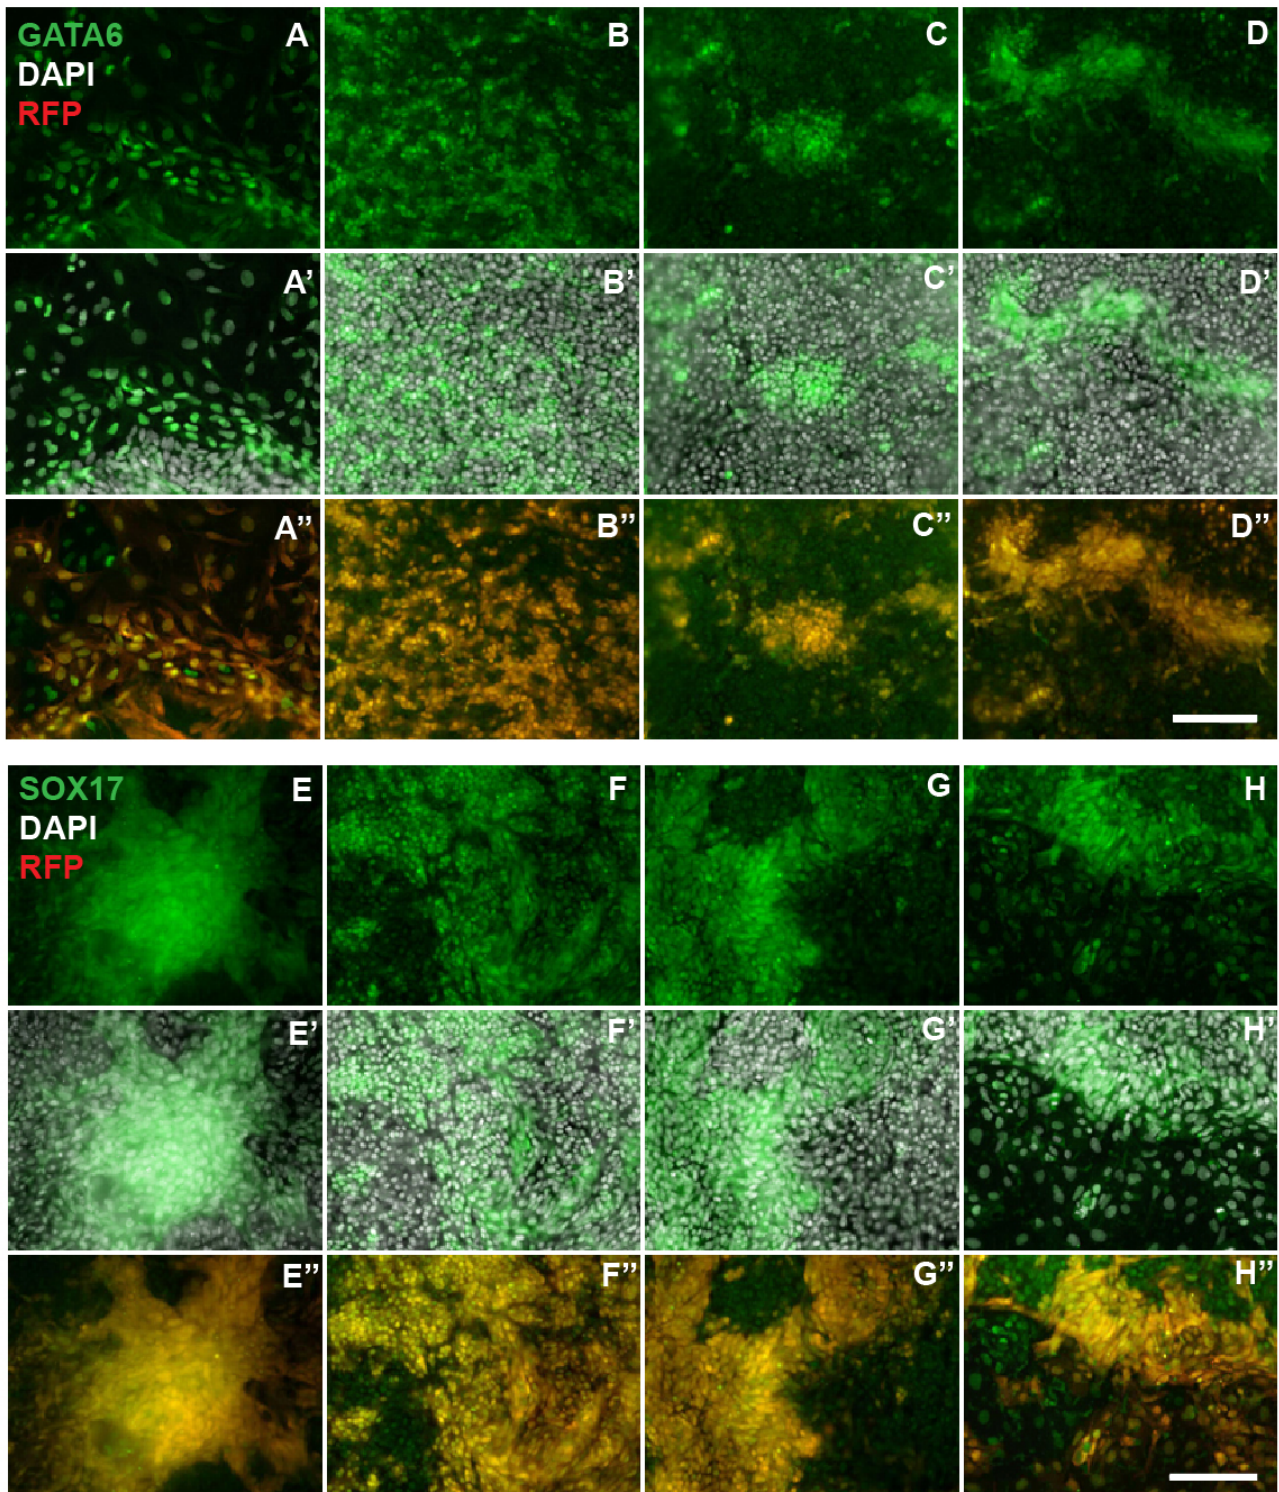

**Supplementary Figure 5.** GATA6 and SOX17-positive cells appear in clusters upon miR-373 overexpression. Shown here are representative images of GATA6 (A-D'') or SOX17 (E-F'') positive cells appearing within TT-miR-373-induced colonies after seven days of doxycycline treatment. GATA6<sup>+</sup> and SOX17<sup>+</sup> cells appeared in clusters, mostly within the center of colonies (B, C, D for GATA 6, E, F, G for SOX17), but also close to their edges (A for GATA6, H for SOX17). DAPI was used for nuclear staining; reporter RFP expression was also visualized. Scale bars: 100 $\mu$ m.

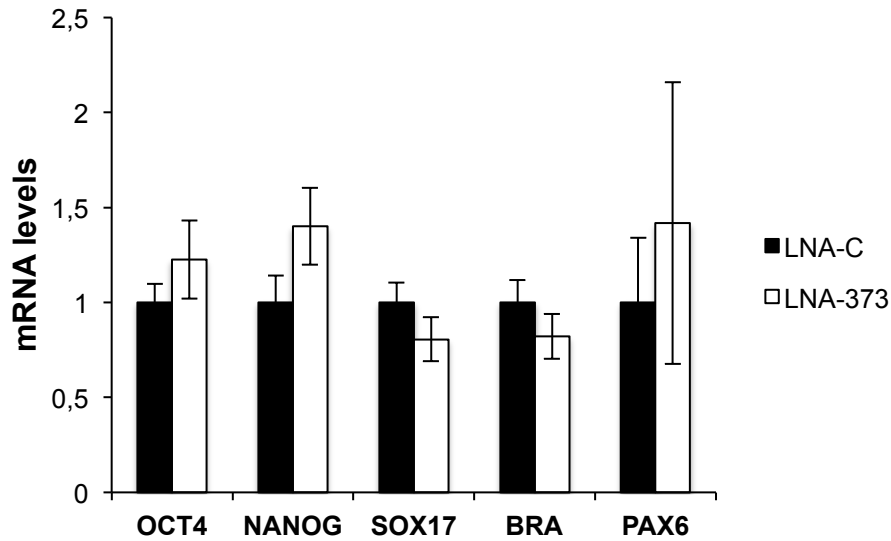

**Supplementary Figure 6.** Real-time qPCR analysis of the levels of the indicated mRNAs in RUEs2 cells transfected with control (LNA-C, black bars) or miR-373 antisense LNAs (LNA-373, white bars), both purchased from Exiqon. RUEs2 cells, maintained in MEF-Conditioned Medium, were transfected with Lipofectamine 2000 with 75nM LNA on day 0 and again on day 2 and collected for RNA extraction at day 4. Data points represent average from technical triplicates.

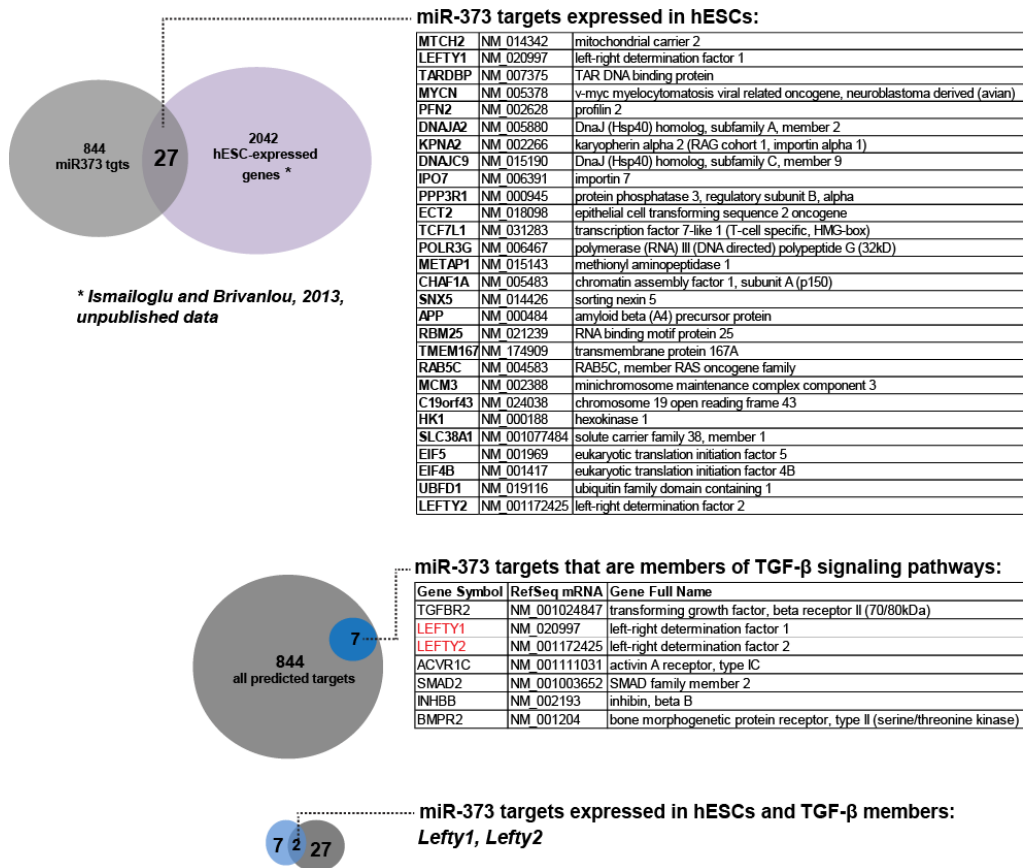

**Supplementary figure 7.** Bioinformatics analysis using the TargetScan software (Lewis et al, 2005) predicts 844 targets for miR-373 in humans. The top panel shows the overlap of this set of genes with genes that are expressed in undifferentiated hESCs (Ismailoglu and Brivanlou, unpublished data); 27 genes are in common. The middle panel shows that 7 genes, among the predicted miR-373 targets, encode for factors involved in the TGF- $\beta$  signaling pathway. Two of them, *Lefty1* and *Lefty2*, are also expressed in hESCs.

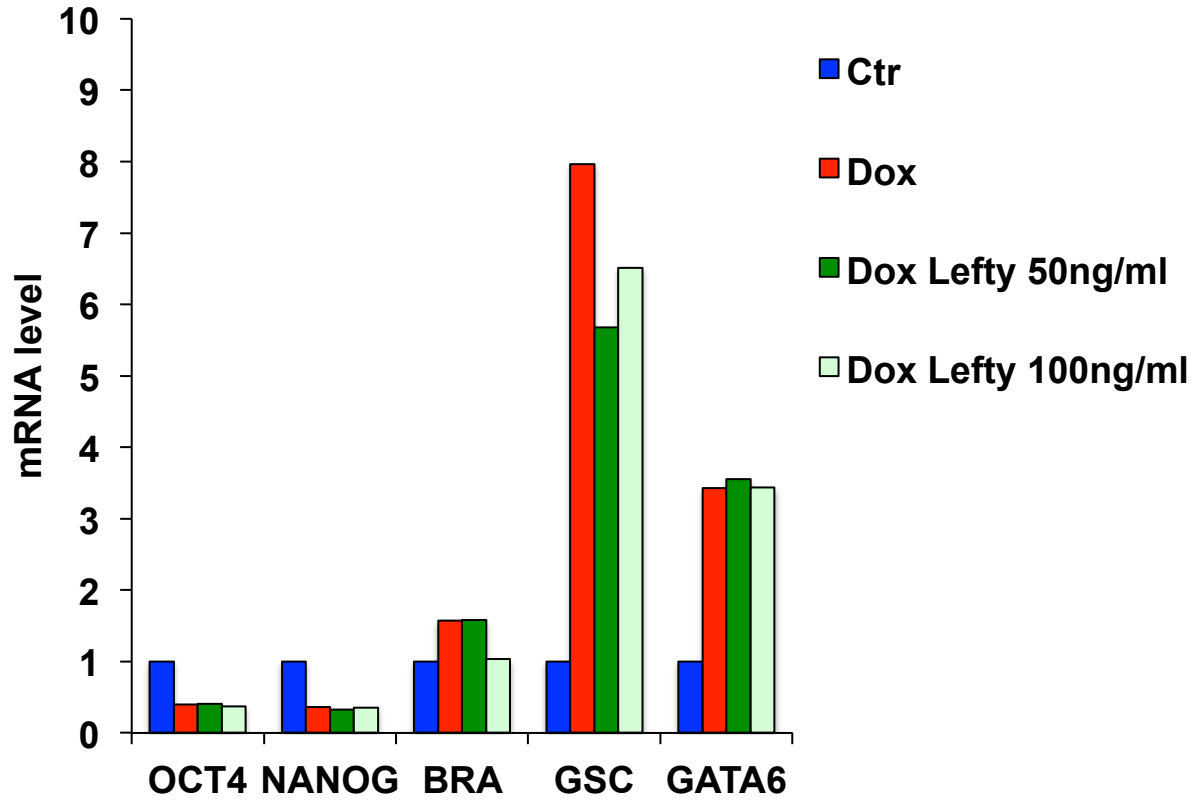

**Supplementary figure 8.** Real-time qPCR of the mRNA levels of the indicated marker genes in TT-miR-373 cells that were induced for 5 days with doxycycline in absence (Dox) or in presence of recombinant LeftyA (R&D, rhLEFTY-A cat#746-LF) at the indicated concentrations. Ctr: uninduced TT-miR-373 cells. BRA: Brachyury. GSC: Goosecoid.



| Probe        | SB_6h | DMSO_6h | SB_24h | DMSO_24h | p.val_6h | p.val_24h | MATURE_MIRNA_SEQ         |
|--------------|-------|---------|--------|----------|----------|-----------|--------------------------|
| hsa-miR-124a | 7.84  | 7.14    | 8.66   | 7.3      | 0.0449   | 0.0011    | TTAAGGCACGCGGTGAATGCCA   |
| hsa-miR-133a | 9.49  | 8.92    | 9.8    | 8.98     | 0.0185   | 0.0024    | TTGGTCCCCTCAACCAGCTGT    |
| hsa-miR-582  | 8.8   | 8.5     | 9.02   | 8.42     | 0.048    | 0.0009    | TTACAGTTGTTCAACCAGTACT   |
| hsa-miR-371  | 11.6  | 11.97   | 11.19  | 12.13    | 0.0754   | 0.0005    | GTGCCGCCATCTTTGAGTGT     |
| hsa-miR-373  | 12.11 | 12.08   | 11.68  | 12.34    | 0.8009   | 0.0003    | GAAGTGCTTCGATTTGGGGTGT   |
| hsa-miR-373* | 7.89  | 8.2     | 7.55   | 8.6      | 0.2123   | 0.0009    | ACTCAAAATGGGGGCGCTTCC    |
| hsa-miR-375  | 10.88 | 11.36   | 10.49  | 11.5     | 0.0228   | 0.0002    | TTTGTTTCGTTTCGGCTCGCGTGA |
| hsa-miR-522  | 10.48 | 10.97   | 10.5   | 11.12    | 0.0169   | 0.0047    | AAAATGGTTCCTTTAGAGTGTT   |
| hsa-miR-614  | 7.64  | 7.58    | 7.15   | 7.76     | 0.7345   | 0.0064    | GAACGCCTGTTCTTGCCAGGTGG  |

### Supplementary Table 1.

Shown here are the nine miRNAs whose expression was significantly up- or down- regulated in RUES2 cells after 24 hours of SB treatment. The raw data values for miRNA expression in SB and control-DMSO samples at both 6 and 24 hours of treatment are given here, along with the p value (p.val) of the DMSO/SB ratio, and the mature miRNA sequence.

| <b>Gene</b>         | <b>F Primer (5'-3')</b>  | <b>R Primer (5'-3')</b>   |
|---------------------|--------------------------|---------------------------|
| <b>Nodal</b>        | AGACATCATCCGCAGCCTACA    | GACCTGGGACAAAAGTGACAGTGAA |
| <b>Lefty2</b>       | ACCTCAGGGACTATGGAGCTCAGG | AGAAATGGCCAATTGAAGGCCAGG  |
| <b>Lefty1</b>       | TGCTACAGGTGTCGGTGCAGAGG  | AGAAACGGCCACTTGAAGGCCAGG  |
| <b>hOct4</b>        | CAAGCTCCTGAAGCAGAAGAGGAT | CTCACTCGGTTCTCGATACTGGTT  |
| <b>hNanog</b>       | CCGGTCAAGAAACAGAAGACCAGA | CCATTGCTATTCTTCGGCCAGTTG  |
| <b>hSox17</b>       | GGCGCAGCAGAATCCAGA       | CCACGACTTGCCCAGCAT        |
| <b>hGata6</b>       | TTCCCGGCAGAGCAGTAAGAGG   | CCGTCAGTCAAGGCCATCCA      |
| <b>hBra</b>         | ATGACAATTGGTCCAGCCTT     | CGTTGCTCACAGACCACA        |
| <b>hGoosecoid</b>   | GAGGAGAAAGTGGAGGTCTGGTT  | CTCTGATGAGGACCGCTTCTG     |
| <b>hMixl1</b>       | GGTACCCCGACATCCACTT      | GCCTGTTCTGGAACCATACTT     |
| <b>hSox1</b>        | CACAACCTCGGAGATCAGCAA    | GTCCTTCTTGAGCAGCGTCT      |
| <b>hPax6</b>        | TCACCATGGCAAATAACCTG     | CAGCATGCAGGAGTATGAGG      |
| <b>hAtp5o</b>       | ACTCGGGTTTGACCTACAGC     | GGTACTGAAGCATCGCACCT      |
| <b>miR-373 SBE1</b> | ACCTTACCAGCCCACTCTTA     | CCAAGGCCTCCTACATCAAAG     |
| <b>miR-373 SBE2</b> | GGTTTCAGGGTGAGGATTCA     | ATCAGAAGTTCTTCTGCTGAG     |
| <b>ChIP Ctr</b>     | TTCTGATTCTTAAAGGAGTGAC   | TTCCTAACATCCACAAGATAAC    |

**Supplementary Table 2**  
Primers for Real-Time qPCR analysis
